# Supplementary material for: Global miRNA expression profiling of domestic cat livers following acute Toxoplasma gondii infection
Source: PubMed Central journal article supplement (PMC5421954; doi:10.18632/oncotarget.16108), 2017-03-10
Supplement: oncotarget-08-25599-s001.pdf [file oncotarget-08-25599-s001.pdf]

## Global miRNA expression profiling of domestic cat livers following acute *Toxoplasma gondii* infection

### SUPPLEMENTARY MATERIALS

### SUPPLEMENTARY FIGURE AND TABLES

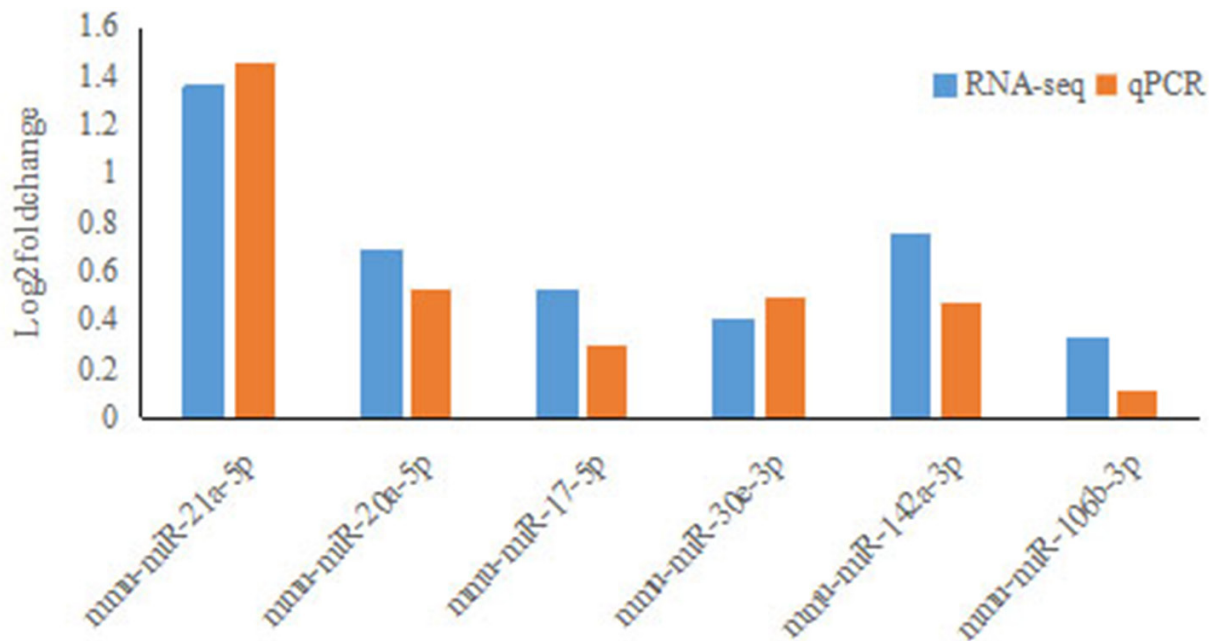

Supplementary Figure 1: Validation of the differential expression of 6 miRNAs identified in the sequencing analysis using stem-loop qRT-PCR. U6 was used as a reference gene.

**Supplementary Table 1: Primers for stem-loop qRT-PCR**

| <b>Primer name</b>   | <b>Primer sequence (5' to 3')</b> |
|----------------------|-----------------------------------|
| mmu-miR-21a-5p F     | ACACTCCAGCTGGGTAGCTTATCAGACTGATG  |
| mmu-miR-20a-5p F     | ACACTCCAGCTGGGTAAAGTGCTTATAGTGCAG |
| mmu-miR-17-5p F      | ACACTCCAGCTGGGCAAAGTGCTTACAGTGCAG |
| mmu-miR-30e-3p F     | ACACTCCAGCTGGGCTTTCAGTCGGATGTTTA  |
| mmu-miR-142a-3p F    | ACACTCCAGCTGGGTGTAGTGTTTCCTACTTTA |
| mmu-miR-106b-3p F    | ACACTCCAGCTGGGCCGCACTGTGGGTACTTG  |
| miRNA-R <sup>a</sup> | CTCAACTGGTGTCGTGGA                |
| U6-F                 | CTCGCTTCGGCAGCACA                 |
| U6-R                 | AACGCTTCACGAATTTGCGT              |

<sup>a</sup> miRNA-R: used as universal primer for miRNA quantification.

**Supplementary Table 2: Predicted gene targets of differentially expressed miRNAs**

See Supplementary File 1
